# Supplementary material
Source: PubMed Central journal article supplement (PMC2878363)
Supplement: bgq058_2.pdf [file bgq058_2.pdf]

| UniGene   | Gene    | Description                                                                                                      |     |
|-----------|---------|------------------------------------------------------------------------------------------------------------------|-----|
| Hs.522891 | CXCL12  | chemokine (C-X-C motif) ligand 12 (stromal cell-derived factor 1) (CXCL12), transcript variant 2, mRNA.          | 5.8 |
| Hs.666782 | PRDM5   | PR domain containing 5 (PRDM5), mRNA.                                                                            | 5.0 |
| Hs.348618 | TRIML1  | tripartite motif family-like 1 (TRIML1), mRNA.                                                                   | 4.1 |
| Hs.591946 | MMP20   | matrix metalloproteinase 20 (MMP20), mRNA.                                                                       | 4.0 |
| Hs.128065 | CTSC    | cathepsin C (CTSC), transcript variant 1, mRNA.                                                                  | 4.0 |
| Hs.476415 | APPL1   | adaptor protein, phosphotyrosine interaction, PH domain and leucine zipper containing 1 (APPL1), mRNA.           | 3.7 |
| Hs.518438 | SOX2    | SRY (sex determining region Y)-box 2 (SOX2), mRNA.                                                               | 3.6 |
| Hs.256022 | RORC    | RAR-related orphan receptor C (RORC), transcript variant 2, mRNA.                                                | 3.4 |
| Hs.121028 | ASPM    | asp (abnormal spindle) homolog, microcephaly associated (Drosophila) (ASPM), mRNA.                               | 3.4 |
| Hs.494738 | IKBKAP  | inhibitor of kappa light polypeptide gene enhancer in B-cells, kinase complex-associated protein (IKBKAP), mRNA. | 3.4 |
| Hs.558799 | PSMA3   | Proteasome (prosome, macropain) subunit, alpha type, 3                                                           | 3.4 |
| Hs.2233   | CSF3    | colony stimulating factor 3 (granulocyte) (CSF3), transcript variant 2, mRNA.                                    | 3.4 |
| Hs.184339 | MELK    | maternal embryonic leucine zipper kinase (MELK), mRNA.                                                           | 3.3 |
| Hs.75573  | CENPE   | centromere protein E, 312kDa (CENPE), mRNA.                                                                      | 3.2 |
| Hs.58992  | SMC4    | structural maintenance of chromosomes 4 (SMC4), transcript variant 2, mRNA.                                      | 3.2 |
| Hs.489207 | ASNS    | asparagine synthetase (ASNS), transcript variant 2, mRNA.                                                        | 3.2 |
| Hs.465337 | PHLPP   | PH domain and leucine rich repeat protein phosphatase (PHLPP), mRNA.                                             | 3.2 |
| Hs.135787 | SALL1   | sal-like 1 (Drosophila) (SALL1), transcript variant 1, mRNA.                                                     | 3.2 |
| Hs.443727 | LHX1    | LIM homeobox 1 (LHX1), mRNA.                                                                                     | 3.2 |
| Hs.148090 | CDH15   | cadherin 15, M-cadherin (myotubule) (CDH15), mRNA.                                                               | 3.1 |
| Hs.144873 | BNIP3   | BCL2/adenovirus E1B 19kDa interacting protein 3 (BNIP3), nuclear gene encoding mitochondrial protein, mRNA.      | 3.1 |
| Hs.444075 | UBASH3B | ubiquitin associated and SH3 domain containing, B (UBASH3B), mRNA.                                               | 3.0 |
| Hs.288772 | TTC12   | tetratricopeptide repeat domain 12 (TTC12), mRNA.                                                                | 3.0 |
| Hs.73793  | VEGFA   | Vascular endothelial growth factor A                                                                             | 3.0 |
| Hs.123107 | KLK1    | kallikrein 1 (KLK1), mRNA.                                                                                       | 2.9 |
| Hs.524390 | TUBA1B  | tubulin, alpha 1b (TUBA1B), mRNA.                                                                                | 2.8 |
| Hs.445098 | DEPDC1  | DEP domain containing 1 (DEPDC1), transcript variant 2, mRNA.                                                    | 2.8 |
| Hs.334562 | CDC2    | cell division cycle 2, G1 to S and G2 to M (CDC2), transcript variant 2, mRNA.                                   | 2.8 |
| Hs.372914 | NDRG1   | N-myc downstream regulated gene 1 (NDRG1), mRNA.                                                                 | 2.7 |
| Hs.153752 | CDC25B  | Cell division cycle 25 homolog B (S. pombe)                                                                      | 2.7 |
| Hs.636480 | TUBB    | tubulin, beta (TUBB), mRNA.                                                                                      | 2.7 |
| Hs.655835 | RAD50   | RAD50 homolog (S. cerevisiae) (RAD50), transcript variant 2, mRNA.                                               | 2.7 |
| Hs.250822 | AURKA   | aurora kinase A (AURKA), transcript variant 6, mRNA.                                                             | 2.7 |
| Hs.680654 | GRK7    | G protein-coupled receptor kinase 7                                                                              | 2.7 |
| Hs.270845 | KIF23   | kinesin family member 23 (KIF23), transcript variant 2, mRNA.                                                    | 2.6 |
| Hs.445497 | HNRPLL  | Heterogeneous nuclear ribonucleoprotein L-like                                                                   | 2.6 |

|           |          |                                                                                                                 |     |
|-----------|----------|-----------------------------------------------------------------------------------------------------------------|-----|
| Hs.524947 | CDC20    | cell division cycle 20 homolog ( <i>S. cerevisiae</i> ) (CDC20), mRNA.                                          | 2.6 |
| Hs.2128   | DUSP5    | dual specificity phosphatase 5 (DUSP5), mRNA.                                                                   | 2.6 |
| Hs.80976  | MKI67    | antigen identified by monoclonal antibody Ki-67 (MKI67), mRNA.                                                  | 2.6 |
| Hs.695    | CSTB     | cystatin B (stefin B) (CSTB), mRNA.                                                                             | 2.6 |
| Hs.591290 | PODXL2   | podocalyxin-like 2 (PODXL2), mRNA.                                                                              | 2.6 |
| Hs.518198 | CSTA     | cystatin A (stefin A) (CSTA), mRNA.                                                                             | 2.6 |
| Hs.514527 | BIRC5    | baculoviral IAP repeat-containing 5 (BIRC5), transcript variant 2, mRNA.                                        | 2.6 |
| Hs.23960  | CCNB1    | cyclin B1 (CCNB1), mRNA.                                                                                        | 2.5 |
| Hs.634882 | ARL6IP1  | ADP-ribosylation factor-like 6 interacting protein 1 (ARL6IP1), mRNA.                                           | 2.5 |
| Hs.411641 | EIF4EBP1 | eukaryotic translation initiation factor 4E binding protein 1 (EIF4EBP1), mRNA.                                 | 2.5 |
| Hs.444414 | AFF3     | AF4/FMR2 family, member 3 (AFF3), transcript variant 2, mRNA.                                                   | 2.5 |
| Hs.454830 | ZIK1     | zinc finger protein interacting with K protein 1 homolog (mouse) (ZIK1), mRNA.                                  | 2.5 |
| Hs.504534 | EFCAB4B  | EF-hand calcium binding domain 4B                                                                               | 2.5 |
| Hs.62180  | ANLN     | anillin, actin binding protein (ANLN), mRNA.                                                                    | 2.5 |
| Hs.270833 | AREG     | amphiregulin (AREG), mRNA.                                                                                      | 2.5 |
| Hs.143733 | CCDC34   | coiled-coil domain containing 34 (CCDC34), transcript variant 1, mRNA.                                          | 2.5 |
| Hs.515032 | MKMK2    | MAP kinase interacting serine/threonine kinase 2 (MKMK2), transcript variant 1, mRNA.                           | 2.5 |
| Hs.431009 | ZFPM2    | zinc finger protein, multitype 2 (ZFPM2), mRNA.                                                                 | 2.5 |
| Hs.1690   | FGFBP1   | fibroblast growth factor binding protein 1 (FGFBP1), mRNA.                                                      | 2.5 |
| Hs.83758  | CKS2     | CDC28 protein kinase regulatory subunit 2 (CKS2), mRNA.                                                         | 2.5 |
| Hs.497220 | RGS13    | regulator of G-protein signaling 13 (RGS13), transcript variant 2, mRNA.                                        | 2.5 |
| Hs.523012 | DDIT4    | DNA-damage-inducible transcript 4 (DDIT4), mRNA.                                                                | 2.5 |
| Hs.194698 | CCNB2    | cyclin B2 (CCNB2), mRNA.                                                                                        | 2.5 |
| Hs.256639 | PPIH     | peptidylprolyl isomerase H (cyclophilin H) (PPIH), mRNA.                                                        | 2.4 |
|           | RAB9P1   | RAB9, member RAS oncogene family, pseudogene 1 (RAB9P1) on chromosome 5.                                        | 2.4 |
| Hs.632833 | PLXNB3   | plexin B3 (PLXNB3), mRNA.                                                                                       | 2.4 |
| Hs.713650 | NFATC2   | nuclear factor of activated T-cells, cytoplasmic, calcineurin-dependent 2 (NFATC2), transcript variant 1, mRNA. | 2.4 |
| Hs.512773 | USHBP1   | Usher syndrome 1C binding protein 1 (USHBP1), mRNA.                                                             | 2.4 |
| Hs.115263 | EREG     | epiregulin (EREG), mRNA.                                                                                        | 2.4 |
| Hs.490789 | PTPRN2   | protein tyrosine phosphatase, receptor type, N polypeptide 2 (PTPRN2), transcript variant 3, mRNA.              | 2.4 |
| Hs.58974  | CCNA2    | cyclin A2 (CCNA2), mRNA.                                                                                        | 2.4 |
| Hs.520087 | PACSIN1  | protein kinase C and casein kinase substrate in neurons 1 (PACSIN1), mRNA.                                      | 2.4 |
| Hs.111749 | PMS1     | PMS1 postmeiotic segregation increased 1 ( <i>S. cerevisiae</i> ) (PMS1), transcript variant 2, mRNA.           | 2.4 |
| Hs.137562 | C18orf45 | chromosome 18 open reading frame 45 (C18orf45), mRNA.                                                           | 2.4 |
| Hs.714759 | LIPT1    | lipoyltransferase 1 (LIPT1), nuclear gene encoding mitochondrial protein, transcript variant 5, mRNA.           | 2.4 |
| Hs.73625  | KIF20A   | kinesin family member 20A (KIF20A), mRNA.                                                                       | 2.4 |
| Hs.707990 | PMCH     | pro-melanin-concentrating hormone (PMCH), mRNA.                                                                 | 2.4 |
| Hs.123119 | SMAD9    | SMAD family member 9 (SMAD9), transcript variant b, mRNA.                                                       | 2.4 |
| Hs.239    | FOXM1    | forkhead box M1 (FOXM1), transcript variant 3, mRNA.                                                            | 2.4 |

|           |         |                                                                                                             |     |
|-----------|---------|-------------------------------------------------------------------------------------------------------------|-----|
| Hs.654543 | TUBB2A  | tubulin, beta 2A (TUBB2A), mRNA.                                                                            | 2.4 |
| Hs.469649 | BUB1    | BUB1 budding uninhibited by benzimidazoles 1 homolog (yeast) (BUB1), mRNA.                                  | 2.4 |
| Hs.279704 | CHRAC1  | chromatin accessibility complex 1 (CHRAC1), transcript variant 1, mRNA.                                     | 2.4 |
| Hs.591697 | MAD2L1  | MAD2 mitotic arrest deficient-like 1 (yeast) (MAD2L1), mRNA.                                                | 2.3 |
| Hs.567567 | NCAPG   | non-SMC condensin I complex, subunit G (NCAPG), mRNA.                                                       | 2.3 |
| Hs.96     | PMAIP1  | Phorbol-12-myristate-13-acetate-induced protein 1                                                           | 2.3 |
| Hs.84113  | CDKN3   | cyclin-dependent kinase inhibitor 3 (CDKN3), transcript variant 1, mRNA.                                    | 2.3 |
| Hs.308332 | RPL10L  | ribosomal protein L10-like (RPL10L), mRNA.                                                                  | 2.3 |
| Hs.792    | TRIM23  | tripartite motif-containing 23 (TRIM23), transcript variant alpha, mRNA.                                    | 2.3 |
| Hs.592049 | PLK1    | polo-like kinase 1 (Drosophila) (PLK1), mRNA.                                                               | 2.3 |
| Hs.161985 | TMPRSS4 | transmembrane protease, serine 4 (TMPRSS4), transcript variant 3, mRNA.                                     | 2.3 |
| Hs.119192 | H2AFZ   | H2A histone family, member Z (H2AFZ), mRNA.                                                                 | 2.3 |
| Hs.121028 | ASPM    | asp (abnormal spindle) homolog, microcephaly associated (Drosophila) (ASPM), mRNA.                          | 2.3 |
| Hs.653495 | MDC1    | mediator of DNA damage checkpoint 1 (MDC1), mRNA.                                                           | 2.3 |
| Hs.445403 | IARS    | isoleucyl-tRNA synthetase (IARS), transcript variant short, mRNA.                                           | 2.3 |
| Hs.706890 | YARS    | tyrosyl-tRNA synthetase (YARS), mRNA.                                                                       | 2.3 |
| Hs.501684 | NAP1L4  | Nucleosome assembly protein 1-like 4                                                                        | 2.3 |
| Hs.558396 | SCD     | stearoyl-CoA desaturase (delta-9-desaturase) (SCD), mRNA.                                                   | 2.3 |
| Hs.519873 | DSP     | desmoplakin (DSP), transcript variant 2, mRNA.                                                              | 2.3 |
| Hs.160562 | IGF1    | insulin-like growth factor 1 (somatomedin C) (IGF1), transcript variant 2, mRNA.                            | 2.3 |
| Hs.426485 | HPX     | hemopexin (HPX), mRNA.                                                                                      | 2.3 |
| Hs.524750 | NUP98   | nucleoporin 98kDa (NUP98), transcript variant 4, mRNA.                                                      | 2.2 |
| Hs.12102  | SNX3    | sorting nexin 3 (SNX3), mRNA.                                                                               | 2.2 |
| Hs.654545 | CHML    | choroideremia-like (Rab escort protein 2) (CHML), mRNA.                                                     | 2.2 |
| Hs.16064  | CNKSR3  | CNKSR family member 3 (CNKSR3), mRNA.                                                                       | 2.2 |
| Hs.445081 | OAF     | OAF homolog (Drosophila) (OAF), mRNA.                                                                       | 2.2 |
| Hs.292925 | CCDC88A | Coiled-coil domain containing 88A                                                                           | 2.2 |
| Hs.121438 | CCDC42  | coiled-coil domain containing 42 (CCDC42), mRNA.                                                            | 2.2 |
| Hs.45056  | KLHL32  | kelch-like 32 (Drosophila) (KLHL32), mRNA.                                                                  | 2.2 |
| Hs.2700   | GLRA2   | glycine receptor, alpha 2 (GLRA2), transcript variant 2, mRNA.                                              | 2.2 |
| Hs.447901 | RHOV    | ras homolog gene family, member V (RHOV), mRNA.                                                             | 2.2 |
| Hs.518900 | TMEM154 | transmembrane protein 154 (TMEM154), mRNA.                                                                  | 2.2 |
| Hs.153704 | NEK2    | NIMA (never in mitosis gene a)-related kinase 2 (NEK2), mRNA.                                               | 2.2 |
| Hs.496487 | ATF4    | activating transcription factor 4 (tax-responsive enhancer element B67) (ATF4), transcript variant 2, mRNA. | 2.2 |
| Hs.169840 | TTK     | TTK protein kinase (TTK), mRNA.                                                                             | 2.2 |
| Hs.478067 | LXN     | latexin (LXN), mRNA.                                                                                        | 2.2 |
| Hs.511817 | PHIP    | pleckstrin homology domain interacting protein (PHIP), mRNA.                                                | 2.2 |
| Hs.517168 | TAGLN2  | transgelin 2 (TAGLN2), mRNA.                                                                                | 2.2 |
| Hs.644095 | NFIB    | nuclear factor I/B (NFIB), mRNA.                                                                            | 2.2 |

|           |          |                                                                                                      |      |
|-----------|----------|------------------------------------------------------------------------------------------------------|------|
| Hs.444028 | CKAP2    | cytoskeleton associated protein 2 (CKAP2), transcript variant 1, mRNA.                               | 2.2  |
| Hs.445203 | DNAJA1   | DnaJ (Hsp40) homolog, subfamily A, member 1                                                          | 2.2  |
| Hs.590911 | LDLRAP1  | low density lipoprotein receptor adaptor protein 1 (LDLRAP1), mRNA.                                  | 2.2  |
| Hs.304376 | PPP1R15B | protein phosphatase 1, regulatory (inhibitor) subunit 15B (PPP1R15B), mRNA.                          | 2.2  |
| Hs.438482 | WDR19    | WD repeat domain 19 (WDR19), mRNA.                                                                   | 2.2  |
| Hs.631992 | DST      | dystonin (DST), transcript variant 1e, mRNA.                                                         | 2.12 |
| Hs.413801 | PSME4    | proteasome (prosome, macropain) activator subunit 4 (PSME4), mRNA.                                   | 2.2  |
| Hs.1594   | CENPA    | centromere protein A (CENPA), transcript variant 2, mRNA.                                            | 2.2  |
| Hs.631659 | CD4      | CD4 molecule (CD4), mRNA.                                                                            | 2.2  |
| Hs.45140  | TMEM35   | transmembrane protein 35 (TMEM35), mRNA.                                                             | 2.2  |
| Hs.14559  | CEP55    | centrosomal protein 55kDa (CEP55), transcript variant 2, mRNA.                                       | 2.2  |
| Hs.55041  | MRPL2    | mitochondrial ribosomal protein L2 (MRPL2), nuclear gene encoding mitochondrial protein, mRNA.       | 2.2  |
| Hs.584881 | FAM162A  | family with sequence similarity 162, member A (FAM162A), mRNA.                                       | 2.2  |
| Hs.124673 | DSEL     | dermatan sulfate epimerase-like (DSEL), mRNA.                                                        | 2.1  |
| Hs.658956 | TMEM45A  | transmembrane protein 45A (TMEM45A), mRNA.                                                           | 2.1  |
| Hs.383403 | GPR97    | G protein-coupled receptor 97 (GPR97), mRNA.                                                         | 2.1  |
| Hs.243987 | GATA4    | GATA binding protein 4 (GATA4), mRNA.                                                                | 2.1  |
| Hs.150580 | EIF1     | eukaryotic translation initiation factor 1 (EIF1), mRNA.                                             | 2.1  |
| Hs.445512 | CCDC25   | coiled-coil domain containing 25 (CCDC25), mRNA.                                                     | 2.1  |
| Hs.705413 | LEPR     | leptin receptor (LEPR), transcript variant 2, mRNA.                                                  | 2.1  |
| Hs.82916  | CCT6A    | chaperonin containing TCP1, subunit 6A (zeta 1) (CCT6A), transcript variant 2, mRNA.                 | 2.1  |
| Hs.149195 | PADI3    | peptidyl arginine deiminase, type III (PADI3), mRNA.                                                 | 2.1  |
| Hs.143728 | WASL     | Wiskott-Aldrich syndrome-like (WASL), mRNA.                                                          | 2.1  |
| Hs.632707 | MARS     | methionyl-tRNA synthetase (MARS), mRNA.                                                              | 2.1  |
| Hs.368783 | NAT5     | N-acetyltransferase 5 (NAT5), transcript variant 1, mRNA.                                            | 2.1  |
| Hs.98564  | CCDC88B  | coiled-coil domain containing 88B (CCDC88B), mRNA.                                                   | 2.1  |
| Hs.525600 | HSP90AA1 | heat shock protein 90kDa alpha (cytosolic), class A member 1 (HSP90AA1), transcript variant 2, mRNA. | 2.1  |
| Hs.212838 | A2M      | alpha-2-macroglobulin (A2M), mRNA.                                                                   | 2.1  |
| Hs.533122 | SFRS10   | splicing factor, arginine/serine-rich 10 (transformer 2 homolog, Drosophila) (SFRS10), mRNA.         | 2.1  |
| Hs.408061 | FABP5    | fatty acid binding protein 5 (psoriasis-associated) (FABP5), mRNA.                                   | 2.1  |
| Hs.10842  | RAN      | RAN, member RAS oncogene family (RAN), mRNA.                                                         | 2.1  |
| Hs.77274  | PLAU     | plasminogen activator, urokinase (PLAU), mRNA.                                                       | 2.1  |
| Hs.709304 | SLC38A1  | solute carrier family 38, member 1 (SLC38A1), transcript variant 2, mRNA.                            | 2.1  |
| Hs.112218 | CAPN10   | calpain 10 (CAPN10), transcript variant 8, mRNA.                                                     | 2.1  |
| Hs.709484 | C4orf30  | chromosome 4 open reading frame 30 (C4orf30), mRNA.                                                  | 2.1  |
| Hs.169182 | KIF21B   | kinesin family member 21B (KIF21B), mRNA.                                                            | 2.1  |
| Hs.101014 | CEP57    | centrosomal protein 57kDa (CEP57), mRNA.                                                             | 2.1  |
| Hs.14601  | HCLS1    | hematopoietic cell-specific Lyn substrate 1 (HCLS1), mRNA.                                           | 2.1  |
| Hs.514033 | SPAG5    | sperm associated antigen 5 (SPAG5), mRNA.                                                            | 2.1  |

|           |          |                                                                                                         |     |
|-----------|----------|---------------------------------------------------------------------------------------------------------|-----|
| Hs.81848  | RAD21    | RAD21 homolog ( <i>S. pombe</i> ) (RAD21), mRNA.                                                        | 2.1 |
| Hs.154299 | F2RL1    | coagulation factor II (thrombin) receptor-like 1 (F2RL1), mRNA.                                         | 2.1 |
| Hs.421509 | CCT4     | Chaperonin containing TCP1, subunit 4 (delta)                                                           | 2.1 |
| Hs.654868 | NPEPL1   | aminopeptidase-like 1 (NPEPL1), mRNA.                                                                   | 2.1 |
| Hs.112405 | S100A9   | S100 calcium binding protein A9 (S100A9), mRNA.                                                         | 2.1 |
| Hs.591975 | RAB38    | RAB38, member RAS oncogene family (RAB38), mRNA.                                                        | 2.1 |
| Hs.404321 | GARS     | glycyl-tRNA synthetase (GARS), mRNA.                                                                    | 2.1 |
| Hs.467701 | ODC1     | ornithine decarboxylase 1 (ODC1), mRNA.                                                                 | 2.1 |
| Hs.558364 | ORC4L    | origin recognition complex, subunit 4-like (yeast) (ORC4L), transcript variant 1, mRNA.                 | 2.1 |
| Hs.486354 | PKIB     | protein kinase (cAMP-dependent, catalytic) inhibitor beta (PKIB), transcript variant 3, mRNA.           | 2.1 |
| Hs.204041 | AHSA1    | AHA1, activator of heat shock 90kDa protein ATPase homolog 1 (yeast) (AHSA1), mRNA.                     | 2.1 |
| Hs.446414 | CD47     | CD47 molecule (CD47), transcript variant 1, mRNA.                                                       | 2.1 |
| Hs.5719   | NCAPD2   | non-SMC condensin I complex, subunit D2 (NCAPD2), mRNA.                                                 | 2.1 |
| Hs.106019 | PPP1R10  | protein phosphatase 1, regulatory (inhibitor) subunit 10 (PPP1R10), mRNA.                               | 2.1 |
| Hs.517145 | ENO1     | enolase 1, (alpha) (ENO1), mRNA.                                                                        | 2.1 |
| Hs.655160 | KRT16    | keratin 16 (KRT16), mRNA.                                                                               | 2.1 |
| Hs.647105 | GIMAP6   | GTPase, IMAP family member 6                                                                            | 2.1 |
| Hs.534032 | TARP     | T cell receptor gamma constant 2                                                                        | 2.1 |
| Hs.459072 | FAM108C1 | family with sequence similarity 108, member C1 (FAM108C1), mRNA.                                        | 2.1 |
| Hs.591785 | IER3     | immediate early response 3 (IER3), mRNA .                                                               | 2.1 |
| Hs.513867 | ITGAE    | integrin, alpha E (antigen CD103, human mucosal lymphocyte antigen 1; alpha polypeptide) (ITGAE), mRNA. | 2.1 |
| Hs.156326 | ZFP57    | zinc finger protein 57 homolog (mouse) (ZFP57), mRNA.                                                   | 2.1 |
| Hs.137569 | TP63     | tumor protein p63 (TP63), transcript variant 5, mRNA.                                                   | 2.1 |
| Hs.696074 | DHX15    | DEAH (Asp-Glu-Ala-His) box polypeptide 15 (DHX15), mRNA.                                                | 2.1 |
| Hs.192233 | PPL      | periplakin (PPL), mRNA.                                                                                 | 2.1 |
| Hs.497575 | SRGAP2   | SLIT-ROBO Rho GTPase activating protein 2 (SRGAP2), transcript variant 1, mRNA.                         | 2.0 |
| Hs.471675 | DGKD     | diacylglycerol kinase, delta 130kDa (DGKD), transcript variant 1, mRNA.                                 | 2.0 |
| Hs.799    | HBEGF    | heparin-binding EGF-like growth factor (HBEGF), mRNA.                                                   | 2.0 |
| Hs.655830 | HELLS    | Helicase, lymphoid-specific                                                                             | 2.0 |
| Hs.29665  | CLSTN1   | calsyntenin 1 (CLSTN1), transcript variant 2, mRNA.                                                     | 2.0 |
|           | N6AMT1   | N-6 adenine-specific DNA methyltransferase 1 (putative) (N6AMT1), transcript variant 1, mRNA.           | 2.0 |
| Hs.344151 | GOLGA4   | golgi autoantigen, golgin subfamily a, 4 (GOLGA4), mRNA.                                                | 2.0 |
| Hs.274873 | CARS     | cysteinyl-tRNA synthetase (CARS), transcript variant 2, mRNA.                                           | 2.0 |
| Hs.508201 | KLHL1    | kelch-like 1 ( <i>Drosophila</i> ) (KLHL1), mRNA.                                                       | 2.0 |
| Hs.177530 | ATP5E    | ATP synthase, H <sup>+</sup> transporting, mitochondrial F1 complex, epsilon subunit (ATP5E)            | 2.0 |
| Hs.369840 | NID2     | nidogen 2 (osteonidogen) (NID2), mRNA.                                                                  | 2.0 |
| Hs.105269 | SC4MOL   | sterol-C4-methyl oxidase-like (SC4MOL), transcript variant 2, mRNA.                                     | 2.0 |
| Hs.644095 | NFIB     | nuclear factor I/B (NFIB), mRNA.                                                                        | 2.0 |
| Hs.528087 | ITPKB    | Inositol 1,4,5-trisphosphate 3-kinase B                                                                 | 2.0 |

|           |         |                                                                                                               |     |
|-----------|---------|---------------------------------------------------------------------------------------------------------------|-----|
| Hs.591715 | SAP30   | Sin3A-associated protein, 30kDa (SAP30), mRNA.                                                                | 2.0 |
| Hs.26770  | FABP7   | Fatty acid binding protein 7, brain                                                                           | 2.0 |
| Hs.519035 | LAD1    | ladinin 1 (LAD1), mRNA.                                                                                       | 2.0 |
| Hs.387804 | PABPC1  | poly(A) binding protein, cytoplasmic 1 (PABPC1), mRNA.                                                        | 2.0 |
| Hs.525088 | CCDC82  | coiled-coil domain containing 82 (CCDC82), mRNA.                                                              | 2.0 |
| Hs.461361 | CFDP1   | craniofacial development protein 1 (CFDP1), mRNA.                                                             | 2.0 |
| Hs.425091 | FAM44B  | family with sequence similarity 44, member B (FAM44B), mRNA.                                                  | 2.0 |
| Hs.465224 | NARS    | asparaginyI-tRNA synthetase (NARS), mRNA.                                                                     | 2.0 |
| Hs.127930 | ADAM18  | ADAM metallopeptidase domain 18 (ADAM18), mRNA.                                                               | 2.0 |
| Hs.446574 | TMSB10  | thymosin beta 10 (TMSB10), mRNA.                                                                              | 2.0 |
| Hs.631907 | DCLK3   | doublecortin-like kinase 3 (DCLK3), mRNA.                                                                     | 2.0 |
| Hs.631699 | BUB1B   | BUB1 budding uninhibited by benzimidazoles 1 homolog beta (yeast) (BUB1B), mRNA.                              | 2.0 |
| Hs.522590 | EIF1AX  | Eukaryotic translation initiation factor 1A, X-linked                                                         | 2.0 |
| Hs.661128 | KREMEN2 | kringle containing transmembrane protein 2 (KREMEN2), transcript variant 2, mRNA.                             | 2.0 |
| Hs.492740 | ATF6    | Activating transcription factor 6                                                                             | 2.0 |
| Hs.713616 | ARVCF   | Armadillo repeat gene deletes in velocardiofacial syndrome                                                    | 2.0 |
| Hs.164502 | UNC13A  | unc-13 homolog A (C. elegans) (UNC13A), mRNA.                                                                 | 2.0 |
| Hs.485784 | SENP6   | SUMO1/sentrin specific peptidase 6 (SENP6), transcript variant 2, mRNA.                                       | 2.0 |
| Hs.478150 | PDCD10  | programmed cell death 10 (PDCD10), transcript variant 3, mRNA.                                                | 2.0 |
| Hs.709248 | CMIP    | C-Maf-inducing protein                                                                                        | 2.0 |
| Hs.435166 | LBR     | lamin B receptor (LBR), transcript variant 2, mRNA.                                                           | 2.0 |
| Hs.436939 | BICD2   | bicaudal D homolog 2 (Drosophila) (BICD2), transcript variant 2, mRNA.                                        | 2.0 |
| Hs.87726  | GGA3    | golgi associated, gamma adaptin ear containing, ARF binding protein 3 (GGA3), transcript variant short, mRNA. | 2.0 |
| Hs.226117 | H1F0    | H1 histone family, member 0 (H1F0), mRNA.                                                                     | 2.0 |
| Hs.632685 | TRUB2   | TruB pseudouridine (psi) synthase homolog 2 (E. coli) (TRUB2), mRNA.                                          | 2.0 |
| Hs.516826 | TRIB3   | tribbles homolog 3 (Drosophila) (TRIB3), mRNA.                                                                | 2.0 |
| Hs.602085 | PHLDA1  | pleckstrin homology-like domain, family A, member 1 (PHLDA1), mRNA.                                           | 2.0 |
| Hs.507916 | TSC22D1 | TSC22 domain family, member 1 (TSC22D1), transcript variant 2, mRNA.                                          | 2.0 |
| Hs.632469 | RAB25   | RAB25, member RAS oncogene family (RAB25), mRNA.                                                              | 2.0 |
| Hs.496710 | STAG2   | Stromal antigen 2                                                                                             | 2.0 |
| Hs.162016 | SULF2   | sulfatase 2 (SULF2), transcript variant 2, mRNA.                                                              | 2.0 |
| Hs.85155  | ZFP36L1 | zinc finger protein 36, C3H type-like 1 (ZFP36L1), mRNA.                                                      | 2.0 |
| Hs.510635 | IGHG1   | Immunoglobulin heavy constant mu                                                                              | 2.0 |
| Hs.527980 | DUT     | deoxyuridine triphosphatase (DUT), nuclear gene encoding mitochondrial protein, transcript variant 3, mRNA.   | 2.0 |
| Hs.171057 | IGSF3   | immunoglobulin superfamily, member 3 (IGSF3), transcript variant 2, mRNA.                                     | 2.0 |
| Hs.712886 | MEGF11  | multiple EGF-like-domains 11 (MEGF11), mRNA.                                                                  | 2.0 |
| Hs.182215 | ARL3    | ADP-ribosylation factor-like 3                                                                                | 2.0 |
| Hs.644877 | TBL1XR1 | transducin (beta)-like 1 X-linked receptor 1 (TBL1XR1), mRNA.                                                 | 2.0 |

|           |           |                                                                                                  |     |
|-----------|-----------|--------------------------------------------------------------------------------------------------|-----|
| Hs.334868 | PPP2R5E   | protein phosphatase 2, regulatory subunit B', epsilon isoform (PPP2R5E), mRNA.                   | 2.0 |
| Hs.534331 | NUDT1     | nudix (nucleoside diphosphate linked moiety X)-type motif 1 (NUDT1), transcript variant 1, mRNA. | 2.0 |
| Hs.507102 | P2RX7     | purinergic receptor P2X, ligand-gated ion channel, 7 (P2RX7), mRNA.                              | 2.0 |
| Hs.417077 | CYP51A1   | cytochrome P450, family 51, subfamily A, polypeptide 1 (CYP51A1), mRNA.                          | 2.0 |
| Hs.57975  | CASQ2     | calsequestrin 2 (cardiac muscle) (CASQ2), mRNA.                                                  | 2.0 |
| Hs.244580 | TPX2      | TPX2, microtubule-associated, homolog (Xenopus laevis) (TPX2), mRNA.                             | 2.0 |
| Hs.476982 | CPOX      | coproporphyrinogen oxidase (CPOX), mRNA.                                                         | 2.0 |
| Hs.227098 | GCM2      | glial cells missing homolog 2 (Drosophila) (GCM2), mRNA.                                         | 2.0 |
| Hs.531987 | KRIT1     | KRIT1, ankyrin repeat containing                                                                 | 2.0 |
| Hs.631582 | SLC1A5    | solute carrier family 1 (neutral amino acid transporter), member 5 (SLC1A5), mRNA.               | 2.0 |
| Hs.292356 | CYBB      | cytochrome b-245, beta polypeptide (CYBB), mRNA.                                                 | 2.0 |
| Hs.489142 | COL1A2    | collagen, type I, alpha 2 (COL1A2), mRNA.                                                        | 2.0 |
| Hs.481571 | UQCRH     | Ubiquinol-cytochrome c reductase hinge protein                                                   | 2.0 |
| Hs.645028 | CCDC14    | coiled-coil domain containing 14 (CCDC14), mRNA.                                                 | 1.9 |
| Hs.591040 | TMEM194A  | transmembrane protein 194A (TMEM194A), transcript variant 2, mRNA.                               | 1.9 |
| Hs.591078 | ERMP1     | endoplasmic reticulum metalloproteinase 1 (ERMP1), mRNA.                                         | 1.9 |
| Hs.498317 | FAM152A   | family with sequence similarity 152, member A (FAM152A), mRNA.                                   | 1.9 |
| Hs.414407 | NDC80     | NDC80 homolog, kinetochore complex component (S. cerevisiae) (NDC80), mRNA.                      | 1.9 |
| Hs.182432 | HIST1H2BM | histone cluster 1, H2bm (HIST1H2BM), mRNA.                                                       | 1.9 |
| Hs.249441 | WEE1      | WEE1 homolog (S. pombe) (WEE1), mRNA.                                                            | 1.9 |
| Hs.534189 | SMC5      | structural maintenance of chromosomes 5 (SMC5), mRNA.                                            | 1.9 |
| Hs.670915 | TTC6      | tetratricopeptide repeat domain 6 (TTC6), mRNA.                                                  | 1.9 |
| Hs.436385 | SLC22A2   | solute carrier family 22 (organic cation transporter), member 2 (SLC22A2), mRNA.                 | 1.9 |
| Hs.17860  | OGDHL     | oxoglutarate dehydrogenase-like (OGDHL), mRNA.                                                   | 1.9 |
| Hs.709304 | SLC38A1   | solute carrier family 38, member 1 (SLC38A1), transcript variant 2, mRNA.                        | 1.9 |
| Hs.126137 | ACOT7     | acyl-CoA thioesterase 7 (ACOT7), transcript variant hBACHd, mRNA.                                | 1.9 |
| Hs.78619  | GGH       | gamma-glutamyl hydrolase (conjugase, folylpolyglutamyl hydrolase) (GGH), mRNA.                   | 1.9 |
| Hs.418533 | BUB3      | BUB3 budding uninhibited by benzimidazoles 3 homolog (yeast) (BUB3), transcript variant 2, mRNA. | 1.9 |
| Hs.115617 | CRHBP     | corticotropin releasing hormone binding protein (CRHBP), mRNA.                                   | 1.9 |
| Hs.208267 | B3GNT5    | UDP-GlcNAc:betaGal beta-1,3-N-acetylglucosaminyltransferase 5 (B3GNT5), mRNA.                    | 1.9 |
| Hs.555985 | NARG1     | NMDA receptor regulated 1 (NARG1), mRNA.                                                         | 1.9 |
| Hs.614734 | PROM1     | prominin 1 (PROM1), mRNA.                                                                        | 1.9 |
| Hs.226390 | RRM2      | ribonucleotide reductase M2 polypeptide (RRM2), mRNA.                                            | 1.9 |
| Hs.2795   | LDHA      | lactate dehydrogenase A (LDHA), mRNA.                                                            | 1.9 |
| Hs.569700 | RFNG      | RFNG O-fucosylpeptide 3-beta-N-acetylglucosaminyltransferase (RFNG), mRNA.                       | 1.9 |
| Hs.648326 | KIF4A     | kinesin family member 4A (KIF4A), mRNA.                                                          | 1.9 |
| Hs.442658 | AURKB     | aurora kinase B (AURKB), mRNA.                                                                   | 1.9 |
| Hs.647093 | XRCC2     | X-ray repair complementing defective repair in Chinese hamster cells 2 (XRCC2), mRNA.            | 1.9 |
| Hs.75307  | H1FX      | H1 histone family, member X (H1FX), mRNA.                                                        | 1.9 |

|           |            |                                                                                                                                         |     |
|-----------|------------|-----------------------------------------------------------------------------------------------------------------------------------------|-----|
| Hs.78061  | TCF21      | transcription factor 21 (TCF21), transcript variant 2, mRNA.                                                                            | 1.9 |
| Hs.644610 | MLYCD      | malonyl-CoA decarboxylase (MLYCD), nuclear gene encoding mitochondrial protein, mRNA.                                                   | 1.9 |
| Hs.335918 | FDPS       | farnesyl diphosphate synthase (farnesyl pyrophosphate synthetase, dimethylallyltranstransferase, geranyltranstransferase) (FDPS), mRNA. | 1.9 |
| Hs.126221 | TRAPPC10   | Trafficking protein particle complex 10                                                                                                 | 1.9 |
| Hs.266782 | KIAA1826   | KIAA1826 (KIAA1826), mRNA.                                                                                                              | 1.9 |
| Hs.26225  | GABRP      | gamma-aminobutyric acid (GABA) A receptor, pi (GABRP), mRNA.                                                                            | 1.9 |
|           | PRO3073    | Hypothetical protein PRO3073                                                                                                            | 1.9 |
| Hs.184298 | CDK7       | cyclin-dependent kinase 7 (CDK7), mRNA.                                                                                                 | 1.9 |
| Hs.1722   | IL1A       | interleukin 1, alpha (IL1A), mRNA.                                                                                                      | 1.9 |
| Hs.468878 | AAK1       | AP2 associated kinase 1                                                                                                                 | 1.9 |
| Hs.381282 | TYRO3      | TYRO3 protein tyrosine kinase (TYRO3), mRNA.                                                                                            | 1.9 |
| Hs.530461 | HIST2H2AA3 | histone cluster 2, H2aa3 (HIST2H2AA3), mRNA.                                                                                            | 1.9 |
| Hs.154320 | UBA3       | ubiquitin-like modifier activating enzyme 3 (UBA3), transcript variant 2, mRNA.                                                         | 1.9 |
| Hs.123016 | HTR1B      | 5-hydroxytryptamine (serotonin) receptor 1B (HTR1B), mRNA.                                                                              | 1.9 |
| Hs.491861 | YTHDF3     | YTH domain family, member 3 (YTHDF3), mRNA.                                                                                             | 1.9 |
| Hs.535177 | ZNF165     | zinc finger protein 165 (ZNF165), mRNA.                                                                                                 | 1.9 |
| Hs.434953 | HMGB2      | high-mobility group box 2 (HMGB2), transcript variant 1, mRNA.                                                                          | 1.9 |
| Hs.143703 | EHD4       | EH-domain containing 4 (EHD4), mRNA.                                                                                                    | 1.9 |
| Hs.112318 | TOMM7      | translocase of outer mitochondrial membrane 7 homolog (yeast) (TOMM7), nuclear gene encoding mitochondrial protein, mRNA.               | 1.9 |
| Hs.544577 | GAPDH      | glyceraldehyde-3-phosphate dehydrogenase (GAPDH), mRNA.                                                                                 | 1.9 |
| Hs.655286 | ZBTB11     | zinc finger and BTB domain containing 11 (ZBTB11), mRNA.                                                                                | 1.9 |
| Hs.381072 | PPIF       | peptidylprolyl isomerase F (cyclophilin F) (PPIF), nuclear gene encoding mitochondrial protein, mRNA.                                   | 1.9 |
| Hs.302435 | CENTG1     | centaurin, gamma 1 (CENTG1), transcript variant 2, mRNA.                                                                                | 1.9 |
| Hs.371282 | TCF3       | transcription factor 3 (E2A immunoglobulin enhancer binding factors E12/E47) (TCF3), mRNA.                                              | 1.9 |
| Hs.440525 | TIMM9      | translocase of inner mitochondrial membrane 9 homolog (yeast) (TIMM9), nuclear gene encoding mitochondrial protein, mRNA.               | 1.9 |
| Hs.155396 | NFE2L2     | nuclear factor (erythroid-derived 2)-like 2 (NFE2L2), mRNA.                                                                             | 1.9 |
| Hs.499886 | ALDH3A2    | aldehyde dehydrogenase 3 family, member A2 (ALDH3A2), transcript variant 2, mRNA.                                                       | 1.9 |
| Hs.131755 | CATSPERB   | cation channel, sperm-associated, beta (CATSPERB), mRNA.                                                                                | 1.9 |
| Hs.26331  | HIST3H2A   | Histone cluster 3, H2a                                                                                                                  | 1.9 |
| Hs.417050 | CCNA1      | cyclin A1 (CCNA1), transcript variant 4, mRNA.                                                                                          | 1.9 |
| Hs.584901 | GPSM2      | G-protein signaling modulator 2 (AGS3-like, C. elegans) (GPSM2), mRNA.                                                                  | 1.9 |
| Hs.445129 | C12orf35   | chromosome 12 open reading frame 35 (C12orf35), mRNA.                                                                                   | 1.9 |
| Hs.9235   | NME4       | non-metastatic cells 4, protein expressed in (NME4), nuclear gene encoding mitochondrial protein, mRNA.                                 | 1.9 |
| Hs.497741 | CENPF      | centromere protein F, 350/400ka (mitosin) (CENPF), mRNA.                                                                                | 1.9 |
| Hs.631750 | PRR11      | proline rich 11 (PRR11), mRNA.                                                                                                          | 1.9 |
| Hs.200804 | SDCBP      | syndecan binding protein (syntenin) (SDCBP), transcript variant 3, mRNA.                                                                | 1.9 |



|           |          |                                                                                                                                                                   |     |
|-----------|----------|-------------------------------------------------------------------------------------------------------------------------------------------------------------------|-----|
| Hs.527778 | CD82     | CD82 molecule (CD82), transcript variant 2, mRNA.                                                                                                                 | 1.9 |
| Hs.632108 | TBCEL    | Tubulin folding cofactor E-like                                                                                                                                   | 1.9 |
| Hs.155569 | CHAC1    | ChaC, cation transport regulator homolog 1 (E. coli) (CHAC1), mRNA.                                                                                               | 1.9 |
| Hs.246310 | ATP5J    | ATP synthase, H <sup>+</sup> transporting, mitochondrial F0 complex, subunit F6 (ATP5J), nuclear gene encoding mitochondrial protein, transcript variant 4, mRNA. | 1.9 |
| Hs.433728 | MAPK4    | Mitogen-activated protein kinase 4                                                                                                                                | 1.9 |
| Hs.480454 | INTS12   | integrator complex subunit 12 (INTS12), mRNA.                                                                                                                     | 1.9 |
| Hs.591084 | FANCG    | Fanconi anemia, complementation group G (FANCG), mRNA.                                                                                                            | 1.9 |
| Hs.589962 | TOPORS   | topoisomerase I binding, arginine/serine-rich (TOPORS), mRNA.                                                                                                     | 1.9 |
| Hs.542050 | TACSTD1  | tumor-associated calcium signal transducer 1 (TACSTD1), mRNA.                                                                                                     | 1.9 |
| Hs.709327 | UTP18    | UTP18, small subunit (SSU) processome component, homolog (yeast) (UTP18), mRNA.                                                                                   | 1.9 |
| Hs.592165 | DNMT3L   | DNA (cytosine-5-)-methyltransferase 3-like (DNMT3L), transcript variant 1, mRNA.                                                                                  | 1.9 |
| Hs.299560 | KRBA1    | KRAB-A domain containing 1                                                                                                                                        | 1.9 |
| Hs.275243 | S100A6   | S100 calcium binding protein A6 (S100A6), mRNA.                                                                                                                   | 1.9 |
| Hs.821    | BGN      | biglycan (BGN), mRNA.                                                                                                                                             | 1.9 |
| Hs.501574 | ADAM8    | ADAM metallopeptidase domain 8                                                                                                                                    | 1.9 |
| Hs.156346 | TOP2A    | topoisomerase (DNA) II alpha 170kDa (TOP2A), mRNA.                                                                                                                | 1.9 |
| Hs.654441 | BCKDHB   | branched chain keto acid dehydrogenase E1, beta polypeptide (BCKDHB), nuclear gene encoding mitochondrial protein, transcript variant 2, mRNA.                    | 1.9 |
| Hs.524216 | CDCA3    | cell division cycle associated 3 (CDCA3), mRNA.                                                                                                                   | 1.9 |
| Hs.308045 | NCAPH    | non-SMC condensin I complex, subunit H (NCAPH), mRNA.                                                                                                             | 1.9 |
| Hs.513463 | NUPR1    | nuclear protein 1 (NUPR1), transcript variant 2, mRNA.                                                                                                            | 1.9 |
| Hs.524161 | RSU1     | Ras suppressor protein 1 (RSU1), transcript variant 2, mRNA.                                                                                                      | 1.9 |
| Hs.592299 | KCNK10   | potassium channel, subfamily K, member 10 (KCNK10), transcript variant 3, mRNA.                                                                                   | 1.9 |
| Hs.71465  | SQLE     | Squalene epoxidase                                                                                                                                                | 1.9 |
| Hs.240    | KIF20B   | kinesin family member 20B (KIF20B), mRNA.                                                                                                                         | 1.9 |
| Hs.700779 | KRT6A    | keratin 6A (KRT6A), mRNA.                                                                                                                                         | 1.9 |
| Hs.434878 | TNFRSF6B | tumor necrosis factor receptor superfamily, member 6b, decoy (TNFRSF6B), transcript variant M68C, mRNA.                                                           | 1.9 |
| Hs.201712 | GLG1     | Golgi apparatus protein 1                                                                                                                                         | 1.9 |
| Hs.135978 | YPEL4    | yippee-like 4 (Drosophila) (YPEL4), mRNA.                                                                                                                         | 1.9 |
| Hs.643648 | UBE2R2   | ubiquitin-conjugating enzyme E2R 2 (UBE2R2), mRNA.                                                                                                                | 1.9 |
| Hs.26136  | PIGY     | phosphatidylinositol glycan anchor biosynthesis, class Y (PIGY), transcript variant 1, mRNA.                                                                      | 1.9 |
| Hs.446309 | GSTA1    | Glutathione S-transferase A1                                                                                                                                      | 1.9 |
| Hs.520028 | HSPA1A   | heat shock 70kDa protein 1A (HSPA1A), mRNA.                                                                                                                       | 1.9 |
| Hs.386189 | GTSE1    | G-2 and S-phase expressed 1 (GTSE1), mRNA.                                                                                                                        | 1.9 |
| Hs.519523 | SERPINB6 | serpin peptidase inhibitor, clade B (ovalbumin), member 6 (SERPINB6), mRNA.                                                                                       | 1.8 |
| Hs.518424 | NDUFB5   | NADH dehydrogenase (ubiquinone) 1 beta subcomplex, 5, 16kDa (NDUFB5), nuclear gene encoding mitochondrial protein, mRNA.                                          | 1.8 |
| Hs.475103 | NUP50    | nucleoporin 50kDa (NUP50), transcript variant 3, mRNA.                                                                                                            | 1.8 |

|           |          |                                                                                                                                              |     |
|-----------|----------|----------------------------------------------------------------------------------------------------------------------------------------------|-----|
| Hs.482868 | TTC37    | tetratricopeptide repeat domain 37 (TTC37), mRNA.                                                                                            | 1.8 |
| Hs.632282 | SLC25A5  | Solute carrier family 25 (mitochondrial carrier; adenine nucleotide translocator), member 5                                                  | 1.8 |
| Hs.508848 | HNRNPC   | heterogeneous nuclear ribonucleoprotein C (C1/C2) (HNRNPC), transcript variant 4, mRNA.                                                      | 1.8 |
| Hs.482077 | ITGA2    | integrin, alpha 2 (CD49B, alpha 2 subunit of VLA-2 receptor) (ITGA2), mRNA.                                                                  | 1.8 |
| Hs.297413 | MMP9     | matrix metalloproteinase 9 (gelatinase B, 92kDa gelatinase, 92kDa type IV collagenase) (MMP9), mRNA.                                         | 1.8 |
| Hs.486508 | SLC2A12  | solute carrier family 2 (facilitated glucose transporter), member 12 (SLC2A12), mRNA.                                                        | 1.8 |
| Hs.414122 | MYH7B    | Myosin, heavy chain 7B, cardiac muscle, beta                                                                                                 | 1.8 |
| Hs.355455 | ANKRD57  | ankyrin repeat domain 57 (ANKRD57), mRNA.                                                                                                    | 1.8 |
| Hs.524183 | FKBP4    | FK506 binding protein 4, 59kDa (FKBP4), mRNA.                                                                                                | 1.8 |
| Hs.585343 | SNX13    | sorting nexin 13 (SNX13), mRNA.                                                                                                              | 1.8 |
| Hs.514870 | ATP5F1   | ATP synthase, H <sup>+</sup> transporting, mitochondrial F0 complex, subunit B1 (ATP5F1), nuclear gene encoding mitochondrial protein, mRNA. | 1.8 |
| Hs.656    | CDC25C   | cell division cycle 25 homolog C (S. pombe) (CDC25C), transcript variant 2, mRNA.                                                            | 1.8 |
| Hs.591729 | PANK3    | pantothenate kinase 3 (PANK3), mRNA.                                                                                                         | 1.8 |
| Hs.476454 | ABHD6    | abhydrolase domain containing 6 (ABHD6), mRNA.                                                                                               | 1.8 |
| Hs.75812  | PCK2     | phosphoenolpyruvate carboxykinase 2 (mitochondrial) (PCK2), nuclear gene encoding mitochondrial protein, transcript variant 1, mRNA.         | 1.8 |
|           |          | Homo sapiens PEBP-like protein (HSP714) mRNA, partial cds                                                                                    | 1.8 |
| Hs.656243 | AMMECR1  | Alport syndrome, mental retardation, midface hypoplasia and elliptocytosis chromosomal region, gene 1 (AMMECR1), transcript variant 2, mRNA. | 1.8 |
| Hs.655351 | SMU1     | smu-1 suppressor of mec-8 and unc-52 homolog (C. elegans) (SMU1), mRNA.                                                                      | 1.8 |
| Hs.567385 | PRC1     | protein regulator of cytokinesis 1 (PRC1), transcript variant 3, mRNA.                                                                       | 1.8 |
| Hs.485158 | SPDEF    | SAM pointed domain containing ets transcription factor (SPDEF), mRNA.                                                                        | 1.8 |
| Hs.500333 | C10orf58 | chromosome 10 open reading frame 58 (C10orf58), mRNA.                                                                                        | 1.8 |
| Hs.27693  | PPIL1    | Peptidylprolyl isomerase (cyclophilin)-like 1                                                                                                | 1.8 |
| Hs.253247 | OSR2     | odd-skipped related 2 (Drosophila) (OSR2), mRNA.                                                                                             | 1.8 |
| Hs.714939 | PMFBP1   | polyamine modulated factor 1 binding protein 1 (PMFBP1), mRNA.                                                                               | 1.8 |
| Hs.372492 | SLC45A4  | Solute carrier family 45, member 4                                                                                                           | 1.8 |
| Hs.861    | MAPK3    | mitogen-activated protein kinase 3 (MAPK3), transcript variant 1, mRNA.                                                                      | 1.8 |
| Hs.1925   | DSG3     | desmoglein 3 (pemphigus vulgaris antigen) (DSG3), mRNA.                                                                                      | 1.8 |
| Hs.371563 | RAB14    | RAB14, member RAS oncogene family (RAB14), mRNA.                                                                                             | 1.8 |
| Hs.460988 | CBFB     | core-binding factor, beta subunit (CBFB), transcript variant 1, mRNA.                                                                        | 1.8 |
| Hs.432674 | LARS     | leucyl-tRNA synthetase (LARS), mRNA.                                                                                                         | 1.8 |
| Hs.388927 | YY1      | YY1 transcription factor (YY1), mRNA.                                                                                                        | 1.8 |
| Hs.144130 | SLC25A36 | solute carrier family 25, member 36 (SLC25A36), transcript variant 2, mRNA.                                                                  | 1.8 |
| Hs.97111  | ZNF530   | Zinc finger protein 530                                                                                                                      | 1.8 |
| Hs.597656 | MSH2     | mutS homolog 2, colon cancer, nonpolyposis type 1 (E. coli) (MSH2), mRNA.                                                                    | 1.8 |
| Hs.443914 | SOD1     | superoxide dismutase 1, soluble (SOD1), mRNA.                                                                                                | 1.8 |
| Hs.418123 | CTSL1    | cathepsin L1 (CTSL1), transcript variant 2, mRNA.                                                                                            | 1.8 |

|           |         |                                                                                                                       |            |
|-----------|---------|-----------------------------------------------------------------------------------------------------------------------|------------|
| Hs.351875 | COX6C   | cytochrome c oxidase subunit VIc (COX6C), mRNA.                                                                       | 1.8        |
| Hs.494173 | ANXA1   | annexin A1 (ANXA1), mRNA.                                                                                             | 1.8        |
| Hs.553498 | PIK3CA  | Phosphoinositide-3-kinase, catalytic, alpha polypeptide<br>Homo sapiens PRO2792 mRNA, complete cds                    | 1.8<br>1.8 |
| Hs.524530 | CTDSP2  | CTD (carboxy-terminal domain, RNA polymerase II, polypeptide A) small phosphatase 2 (CTDSP2), mRNA.                   | 1.8        |
| Hs.1197   | HSPE1   | heat shock 10kDa protein 1 (chaperonin 10) (HSPE1), mRNA.                                                             | 1.8        |
| Hs.516746 | DAP3    | death associated protein 3 (DAP3), nuclear gene encoding mitochondrial protein, transcript variant 2, mRNA.           | 1.8        |
| Hs.632575 | YEATS2  | YEATS domain containing 2 (YEATS2), mRNA.                                                                             | 1.8        |
| Hs.507680 | N4BP2L2 | NEDD4 binding protein 2-like 2 (N4BP2L2), transcript variant 1, mRNA.                                                 | 1.8        |
| Hs.442337 | S100A7A | S100 calcium binding protein A7A (S100A7A), mRNA.                                                                     | 1.8        |
| Hs.8546   | NOTCH3  | Notch homolog 3 (Drosophila) (NOTCH3), mRNA.                                                                          | 1.8        |
| Hs.114412 | TXNL1   | thioredoxin-like 1 (TXNL1), mRNA.                                                                                     | 1.8        |
| Hs.33366  | CDCA2   | cell division cycle associated 2 (CDCA2), mRNA.                                                                       | 1.8        |
| Hs.530412 | SERBP1  | SERPINE1 mRNA binding protein 1 (SERBP1), transcript variant 4, mRNA.                                                 | 1.8        |
| Hs.558422 | SMARCA5 | SWI/SNF related, matrix associated, actin dependent regulator of chromatin,<br>subfamily a, member 5 (SMARCA5), mRNA. | 1.8<br>1.8 |
| Hs.288998 | S100A14 | S100 calcium binding protein A14 (S100A14), mRNA.                                                                     | 1.8        |
| Hs.329266 | HIP1    | huntingtin interacting protein 1 (HIP1), mRNA.                                                                        | 1.8        |
| Hs.75182  | MRC1    | mannose receptor, C type 1 (MRC1), mRNA.                                                                              | 1.8        |
