# Supplementary material
Source: PubMed Central journal article supplement (PMC2878363)
Supplement: bgq058_3.pdf [file bgq058_3.pdf]

| Annotation Cluster 1 |                                                              | Enrichment Score: 15.12 |                                                                                       | Count | P_Value | Fold Enrichment | Benjamini |
|----------------------|--------------------------------------------------------------|-------------------------|---------------------------------------------------------------------------------------|-------|---------|-----------------|-----------|
| GOTERM_BP_ALL        | <a href="#">mitosis</a>                                      | <b>RT</b>               |    | 37    | 4.4E-22 | 8               | 2.3E-18   |
| GOTERM_BP_ALL        | <a href="#">M phase of mitotic cell cycle</a>                | <b>RT</b>               |    | 37    | 5.9E-22 | 7.9             | 1.6E-18   |
| SP_PIR_KEYWORDS      | <a href="#">mitosis</a>                                      | <b>RT</b>               |    | 28    | 1.3E-20 | 11.2            | 1.4E-17   |
| GOTERM_BP_ALL        | <a href="#">mitotic cell cycle</a>                           | <b>RT</b>               |    | 40    | 9.5E-20 | 6.2             | 1.7E-16   |
| GOTERM_BP_ALL        | <a href="#">M phase</a>                                      | <b>RT</b>               |    | 38    | 1.6E-19 | 6.5             | 2.1E-16   |
| SP_PIR_KEYWORDS      | <a href="#">cell division</a>                                | <b>RT</b>               |    | 31    | 2.4E-18 | 8               | 1.3E-15   |
| GOTERM_BP_ALL        | <a href="#">cell cycle phase</a>                             | <b>RT</b>               |    | 39    | 3.3E-17 | 5.4             | 3.5E-14   |
| SP_PIR_KEYWORDS      | <a href="#">cell cycle</a>                                   | <b>RT</b>               |    | 40    | 2.0E-16 | 5               | 7.9E-14   |
| GOTERM_BP_ALL        | <a href="#">cell division</a>                                | <b>RT</b>               |    | 32    | 2.8E-16 | 6.4             | 1.9E-13   |
| GOTERM_BP_ALL        | <a href="#">cell cycle process</a>                           | <b>RT</b>               |    | 51    | 7.8E-14 | 3.3             | 5.9E-11   |
| GOTERM_BP_ALL        | <a href="#">cell cycle</a>                                   | <b>RT</b>               |    | 56    | 1.1E-13 | 3.1             | 7.2E-11   |
| GOTERM_BP_ALL        | <a href="#">regulation of progression through cell cycle</a> | <b>RT</b>               |    | 32    | 1.1E-7  | 3               | 5.2E-5    |
| GOTERM_BP_ALL        | <a href="#">regulation of cell cycle</a>                     | <b>RT</b>               |    | 32    | 1.2E-7  | 3               | 5.4E-5    |
| GOTERM_CC_ALL        | <a href="#">microtubule cytoskeleton</a>                     | <b>RT</b>               |    | 26    | 8.0E-7  | 3.2             | 7.7E-5    |
| Annotation Cluster 2 |                                                              | Enrichment Score: 5.85  |                                                                                       | Count | P_Value | Fold Enrichment | Benjamini |
| GOTERM_CC_ALL        | <a href="#">spindle</a>                                      | <b>RT</b>               |  | 14    | 4.9E-9  | 8.9             | 2.1E-6    |
| GOTERM_CC_ALL        | <a href="#">microtubule cytoskeleton</a>                     | <b>RT</b>               |  | 26    | 8.0E-7  | 3.2             | 7.7E-5    |
| GOTERM_CC_ALL        | <a href="#">cytoskeletal part</a>                            | <b>RT</b>               |  | 29    | 7.1E-4  | 2               | 2.9E-2    |

Fig. S1
